# Supplementary material
Source: PubMed Central journal article supplement (PMC1464895)
Supplement: JCI0625397sd.pdf [file JCI0625397sd.pdf]

a. iTAC mouse

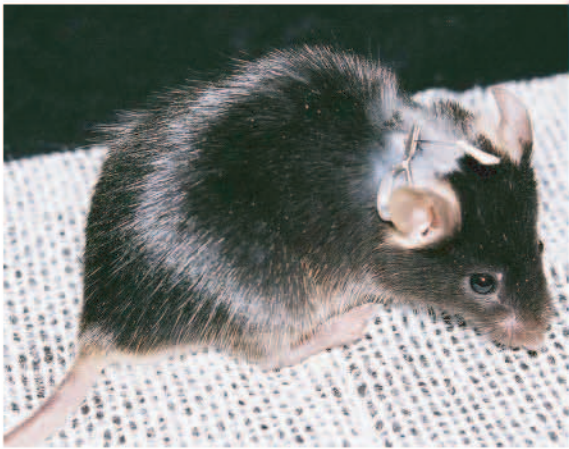

b. Experimental Design I (4 WEEKS)

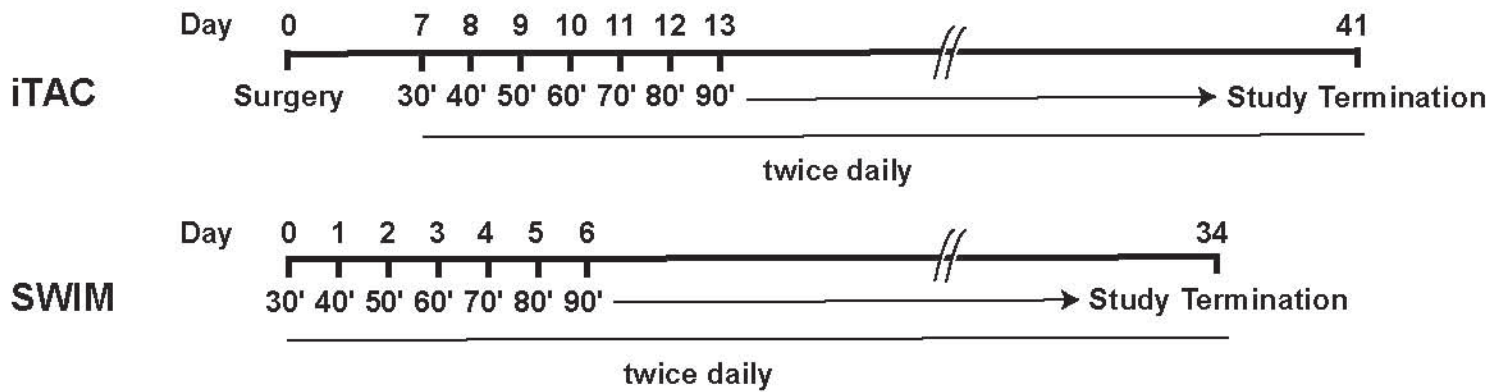

c. Experimental Design II (1 WEEK)

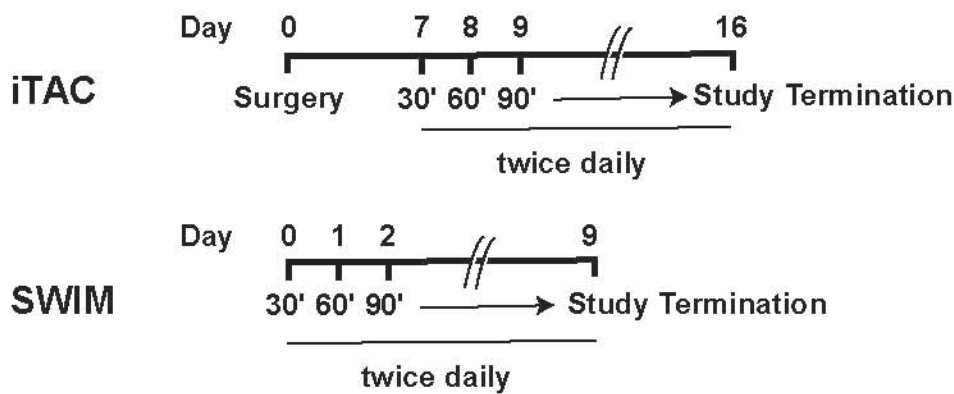

d. Experimental Design III (1 WEEK + metoprolol)

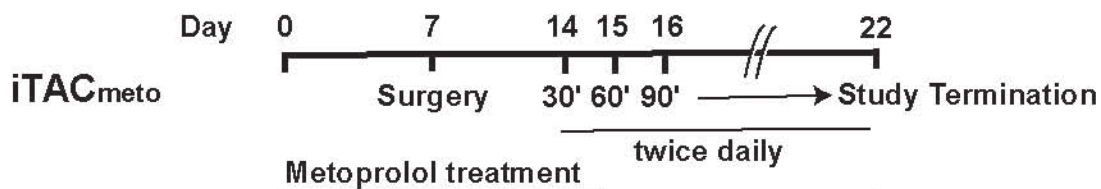

a

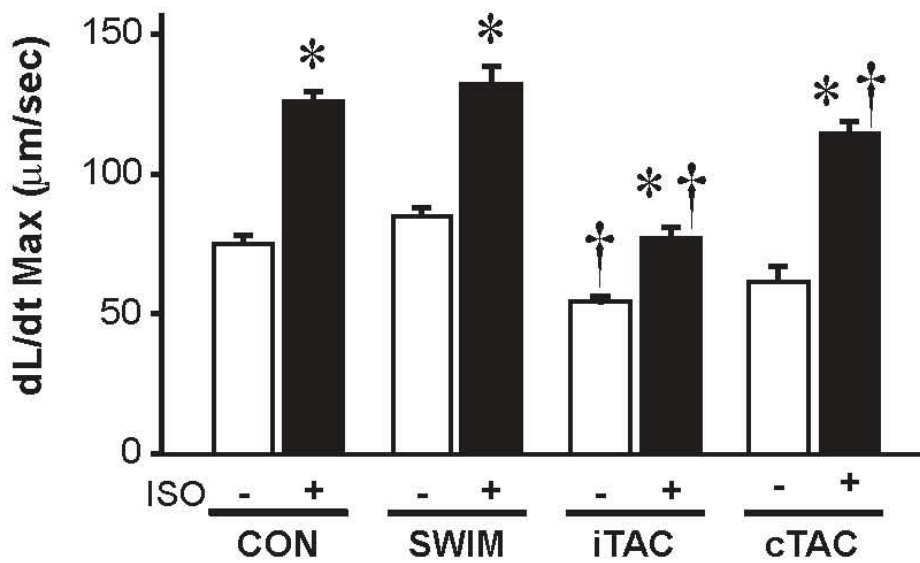

b

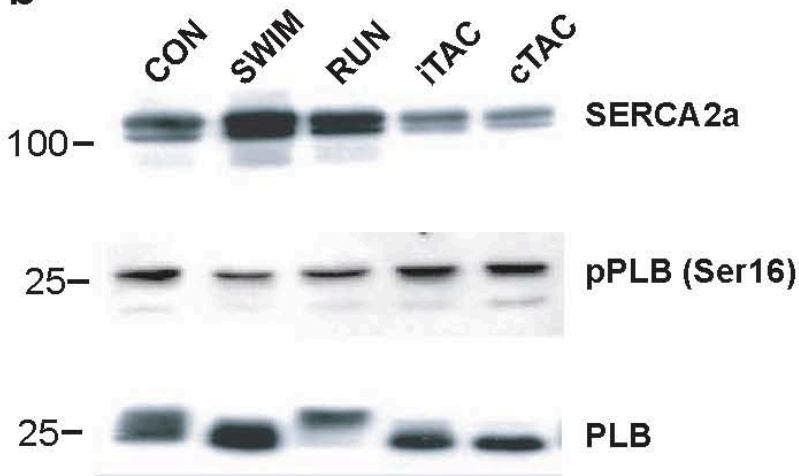

### Abnormal relaxation in cells isolated from hearts exposed to intermittent pressure overload (iTAC) for 4 weeks

(a) dL/dt max in freshly isolated cardiomyocytes from CON, SWIM, iTAC and cTAC hearts under basal conditions (white bars) and following stimulation with isoproterenol (ISO) 1 µM. In cells from iTAC hearts, dL/dt max was significantly reduced vs. CON under basal conditions ( $72.5 \pm 2.4$  % of basal CON) and following ISO stimulation (iTAC:  $1.1 \pm 0.07$  fold over basal; CON:  $1.7 \pm 0.07$ , \*  $p < 0.01$  vs. respective basal; †  $p < 0.01$  vs. correspondent CON or SWIM).

(b) Immunoblotting of cardiac cytosolic lysates for SERCA2a ATPase, total phospholamban (PLB) and phospho-phospholamban (pPLB-Ser 16).

### Supplementary Figure 3

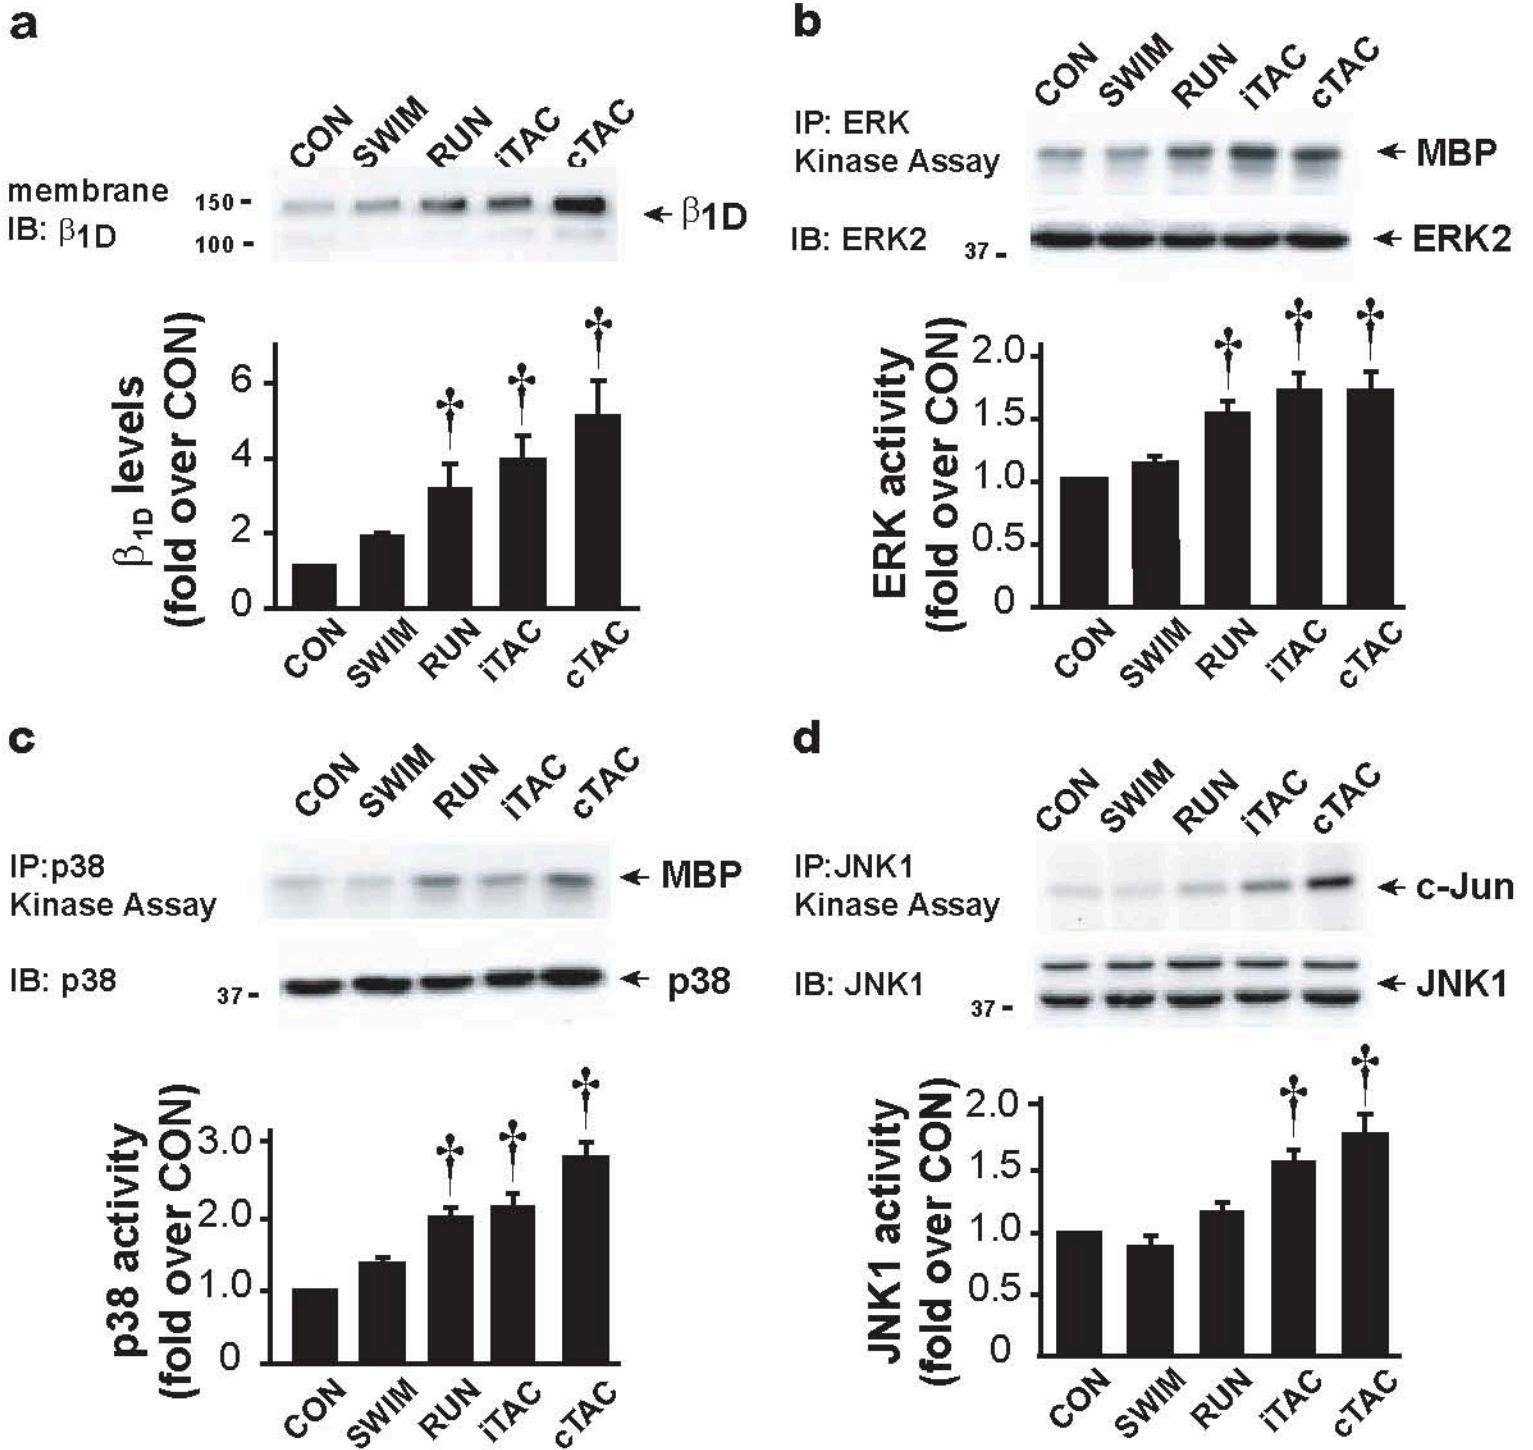

### Physiological and pathological mechanical loads are differently sensed by the heart

(a) Representative immunoblotting showing integrin  $\beta_{1D}$  levels in membranes from mouse hearts of the different groups; densitometric analysis of at least five different experiments is shown in the lower panel ( $\dagger p < 0.01$  vs. CON or SWIM). (b-d top panels) MAPKs activation was determined for ERK and p38 by the ability to in vitro phosphorylate myelin binding protein (MBP); for JNK1, recombinant GST-cJun (cJun) was used as substrate. Immunoblotting was also carried out to evaluate total protein levels of each kinase (b-d, middle panels). Densitometric evaluation of the kinase assays in at least five experiments is shown for each kinase (b-d, lower panels,  $\dagger p < 0.01$  vs. CON or SWIM).

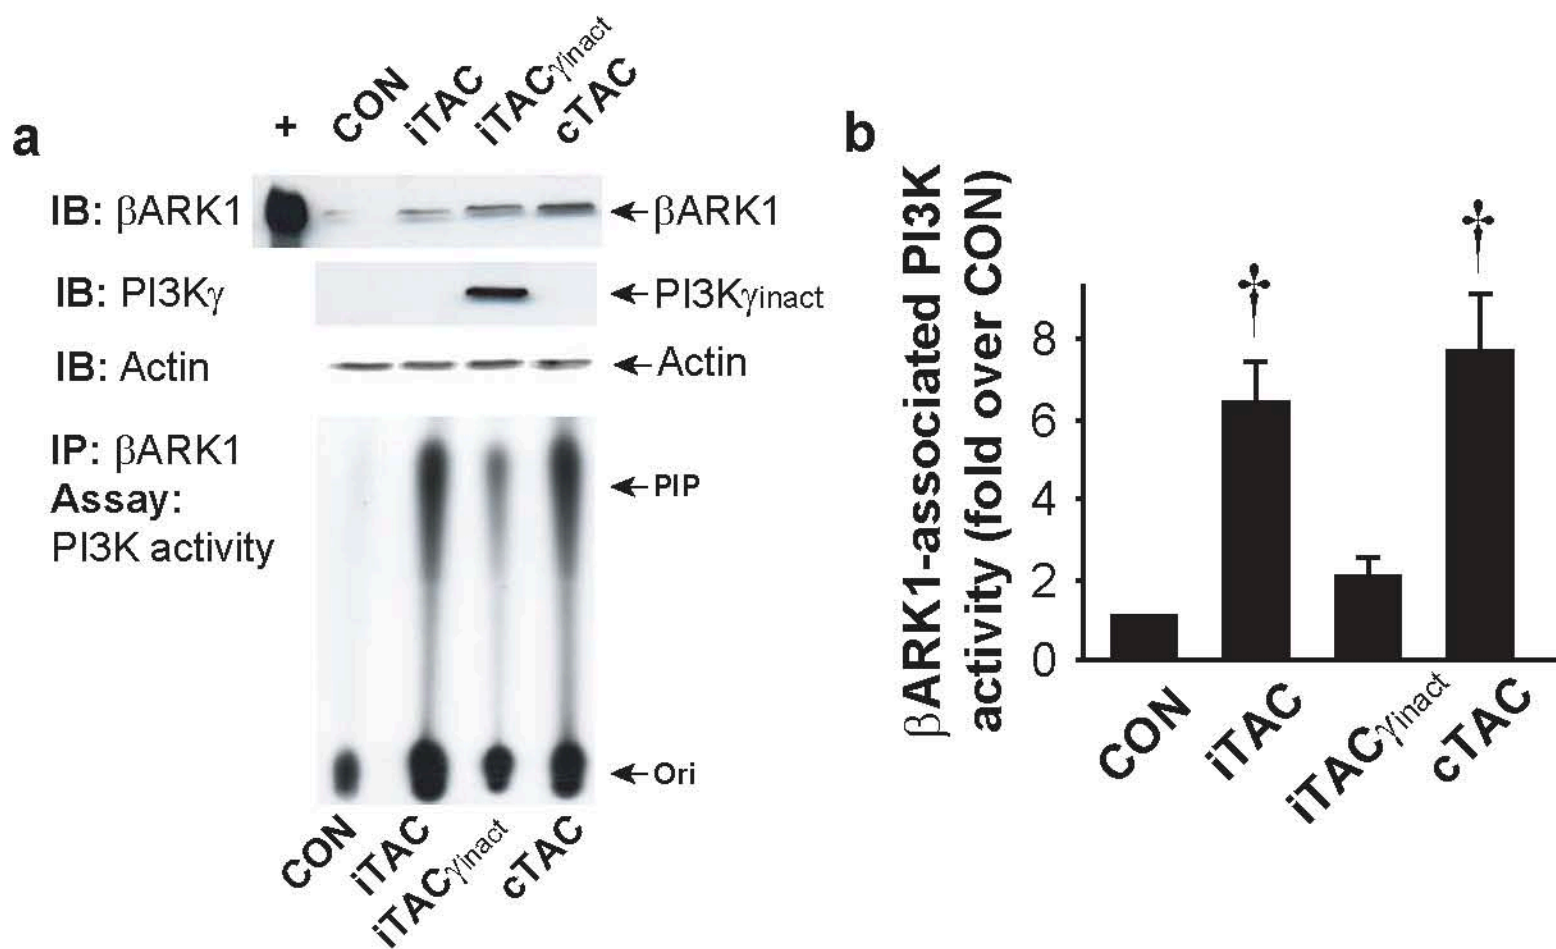

(a) Representative pictures showing  $\beta$ ARK1 (upper panel), PI3K $\gamma$ <sup>inact</sup> (middle panel), actin levels (lower panel) and resultant  $\beta$ ARK1-associated PI3K activity in the membrane fractions of mouse hearts.

(b) Summary data of 8 different experiments and relative statistical analysis of  $\beta$ ARK1-associated PI3K activity in the cardiac membrane from the different groups.
